# Supplementary material for: Evolutionary trade-offs associated with copy number variations in resistance alleles in Culex pipiens mosquitoes
Source: Parasit Vectors. 2022 Dec 22;15:484. doi: 10.1186/s13071-022-05599-8 (PMC9783466; doi:10.1186/s13071-022-05599-8)
Supplement: Supplementary file 1 — Additional file 1: Sequence alignment for R1 (SR) and R2 (SRQ). The primers used for the PCR amplification are indicated (light gray) as well as the restriction sites for the BfaI and AluI enzymes (darker gray, the triangles indicate restriction cuts). Mutations between the two sequences are in bold. [file 13071_2022_5599_MOESM1_ESM.pdf]

**Additional File 1 : Sequence alignment for R<sub>1</sub> (SR) and R<sub>2</sub> (SRQ).** The primers used for the PCR amplification are indicated (light gray), as well as the restriction sites for the *Bfal* and *Alul* enzymes (darker gray, the triangles indicate where restriction cuts). Mutations between the two sequences are bolded.

|                     |                                                                                            |             |                 |  |     |
|---------------------|--------------------------------------------------------------------------------------------|-------------|-----------------|--|-----|
|                     | 1                                                                                          |             |                 |  | 50  |
| R <sub>1</sub> -SR  | GCGCGAGCAT ATCCATAGCA CTACGACCCG GCGGCGTGGC CT <b>G</b> ACCCGGA                            |             |                 |  |     |
| R <sub>2</sub> -SRQ | GCGCGAGCAT ATCCATAGCA CTACGACCCG GCGGCGTGGC CT <b>A</b> ACCCGGA                            |             |                 |  |     |
|                     | Primer Intron2dir1                                                                         |             |                 |  |     |
|                     | 51                                                                                         |             |                 |  | 100 |
| R <sub>1</sub> -SR  | GGGAGTCCAG CTCCGGTGAG TTCT <b>G</b> GGAGG GG..... G <b>C</b> CATTT.CC                      |             |                 |  |     |
| R <sub>2</sub> -SRQ | GGGAGTCCAG CTCCGGTGAG TTCT <b>A</b> GGAGG GG <b>CTTTTGGG</b> G <b>T</b> CATTT <b>G</b> CC  |             |                 |  |     |
|                     |                                                                                            |             | <i>Bfal</i>     |  |     |
|                     | 101                                                                                        |             |                 |  | 150 |
| R <sub>1</sub> -SR  | CTTTGCTAAC TAATT <b>T</b> ACTC CAATTTTCGT AGATGCCACC GACTCGGACC                            |             |                 |  |     |
| R <sub>2</sub> -SRQ | CTTTGCTAAC TAATT <b>C</b> ACTC CAATTTTCGT AGATGCCACC GACTCGGACC                            |             |                 |  |     |
|                     | 151                                                                                        |             |                 |  | 200 |
| R <sub>1</sub> -SR  | CACTGGT <b>A</b> AT AACGACGGAC AAG <b>G</b> GC AAAA TCCGTGGAAC GACACTGGAA                  |             |                 |  |     |
| R <sub>2</sub> -SRQ | CACTGGT <b>C</b> AT AACGACGGAC AA <b>A</b> GGC AAAA TCCGTGGAAC GACACTGGAA                  |             |                 |  |     |
|                     | 201                                                                                        |             |                 |  | 250 |
| R <sub>1</sub> -SR  | GCGCC <b>A</b> AGTG GAAAGAAGGT GGACGCATGG ATGGGCATTTC CGTACGCGCA                           |             |                 |  |     |
| R <sub>2</sub> -SRQ | GCGCC <b>T</b> AGCG GAAAGAAGGT GGACGCATGG ATGGGCATTTC CGTACGCGCA                           |             |                 |  |     |
|                     |                                                                                            | <i>Bfal</i> |                 |  |     |
|                     | 251                                                                                        |             |                 |  | 300 |
| R <sub>1</sub> -SR  | GCC <b>C</b> CCGCTG GGTCCGCTCC GGTTTCGACA TCCGCGACCC GCCGAAAGAT                            |             |                 |  |     |
| R <sub>2</sub> -SRQ | GCC <b>T</b> CCGCTG GGTCCGCTCC GGTTTCGACA TCCGCGACCC GCCGAAAGAT                            |             |                 |  |     |
|                     | 301                                                                                        |             |                 |  | 350 |
| R <sub>1</sub> -SR  | GGACCGGTGT GCTGAACGCG ACCAAACC <b>A</b> C CCAACTCCTG CGTCCAGATC                            |             |                 |  |     |
| R <sub>2</sub> -SRQ | GGACCGGTGT GCTGAACGCG ACCAAACC <b>G</b> C CCAACTCCTG CGTCCAGATC                            |             |                 |  |     |
|                     | 351                                                                                        |             |                 |  | 400 |
| R <sub>1</sub> -SR  | GTGGACACCG TGTTCGGTGA CTTCCCGGGG GCCACCATGT GGAACCCGAA                                     |             |                 |  |     |
| R <sub>2</sub> -SRQ | GTGGACACCG TGTTCGGTGA CTTCCCGGGG GCCACCATGT GGAACCCGAA                                     |             |                 |  |     |
|                     | 401                                                                                        |             |                 |  | 450 |
| R <sub>1</sub> -SR  | CACACC <b>C</b> CTC TCGGAGGACT GTCTGTACAT CAACGTGGTC GTGCCA <b>A</b> GGC                   |             |                 |  |     |
| R <sub>2</sub> -SRQ | CACACC <b>G</b> CTC TCGGAGGACT GTCTGTACAT CAACGTGGTC GTGCCA <b>C</b> GGC                   |             |                 |  |     |
|                     | 451                                                                                        |             |                 |  | 500 |
| R <sub>1</sub> -SR  | <b>C</b> GAGGCCCAA GAATGCCG <b>C</b> T GTCATGCTGT GGATCTT <b>T</b> GG GGGTAG <b>C</b> TTTC |             |                 |  |     |
| R <sub>2</sub> -SRQ | <b>C</b> CAGGCCCAA GAATGCCG <b>C</b> C GTCATGCTGT GGATCTT <b>C</b> GG GGGTAG <b>C</b> TTTC |             |                 |  |     |
|                     |                                                                                            |             | <i>Alul</i>     |  |     |
|                     | 501                                                                                        |             |                 |  | 550 |
| R <sub>1</sub> -SR  | TACTCCGGGA CTGCCACG <b>T</b> T GGACGTGTAC GAT <b>T</b> CAT <b>T</b> CGGA CGCTGGCCTC        |             |                 |  |     |
| R <sub>2</sub> -SRQ | TACTCCGGGA CTGCCACG <b>C</b> T GGACGTGTAC GAT <b>C</b> CA <b>C</b> CGGA CGCTGGCCTC         |             |                 |  |     |
|                     | 551                                                                                        |             |                 |  | 597 |
| R <sub>1</sub> -SR  | GGAGGAGAAC GTGATCGT <b>G</b> G TTTCGCTGCA GTACCGTGTC GCAAGTC                               |             |                 |  |     |
| R <sub>2</sub> -SRQ | GGAGGAGAAC GTGATCGT <b>A</b> G TTTCGCTGCA GTACCGTGTC GCAAGTC                               |             |                 |  |     |
|                     |                                                                                            |             | Primer CpEx3rev |  |     |
